# Supplementary material for: Tackling unmanaged oropharyngeal dysphagia in primary care: a behavioural science realist review of interventions
Source: HighWire-hosted journal article supplement (doi:10.1136/bmjopen-2024-086184), 2024-08-01
Supplement: bmjopen-2024-086184supp009_data_supplement.pdf [file bmjopen-2024-086184supp009_data_supplement.pdf]

## Supplementary file 9. Evidence characteristics from snowballing

| Author                             | Title                                                                                                                                                                                       | Country | Study setting | Practitioner group                                                                                                                                                                | Study design             | Study description                                                                                                                                                                                                    | Relevant findings                                                                                                                        | Relevance Richness Rigour*                         |
|------------------------------------|---------------------------------------------------------------------------------------------------------------------------------------------------------------------------------------------|---------|---------------|-----------------------------------------------------------------------------------------------------------------------------------------------------------------------------------|--------------------------|----------------------------------------------------------------------------------------------------------------------------------------------------------------------------------------------------------------------|------------------------------------------------------------------------------------------------------------------------------------------|----------------------------------------------------|
| <b>Barker et al. (2022)</b><br>(1) | The development and implementation of an evidence-based risk reduction algorithm for post extubation dysphagia in intensive care                                                            | Canada  | Hospital      | Respiratory therapists (N=20)<br>Physicians (N=14)<br>Dietician (N=1)<br>Physiotherapists (N=4)                                                                                   | Intervention development | Evaluation of the Swallowing Algorithm Post-Extubation (SAPE) algorithm and associated training to guide registered nurses to identify dysphagia and make decisions regarding referral to speech & language therapy. | After training, 74% of HCPs felt confident to identify OD risk factors. After following SAPE, 84% said they would consider SLT referral. | High relevance<br>Moderate richness<br>Rigour: 6/7 |
| <b>Bowen et al. (2023)</b><br>(2)  | Advancing health equity: A qualitative study assessing barriers and facilitators of implementing hereditary breast and ovarian cancer risk screening tools in community-based organizations | America | Community     | Administrator (N=2)<br>Patient Navigator (N=7)<br>Nurse (N=7)<br>Director (N=3)<br>Community Health Educator (N=7)<br>Volunteer (N=5)<br>Healthcare provider (N=3)<br>Other (N=1) | Qualitative-Focus groups | Exploration of preferences for cancer risk screening tools and identified barriers and facilitators for screening tool implementation.                                                                               | Screening tools which are quick, simple and with clear referral guidelines facilitate HCPs to decide whether to refer to SLT.            | High relevance<br>High richness<br>Rigour: 7/7     |

|                                      |                                                                                                                                                       |           |                                |                                                |                                                                                |                                                                                                                                  |                                                                                                                                                                                                 |                                                    |
|--------------------------------------|-------------------------------------------------------------------------------------------------------------------------------------------------------|-----------|--------------------------------|------------------------------------------------|--------------------------------------------------------------------------------|----------------------------------------------------------------------------------------------------------------------------------|-------------------------------------------------------------------------------------------------------------------------------------------------------------------------------------------------|----------------------------------------------------|
| <b>Farpour et al. (2019)</b><br>(3)  | Dysphagia Management in Iran: Knowledge, Attitude and Practice of Healthcare Providers                                                                | Iran      | Hospitals                      | Nurses (N=112)<br>Physicians (N=54)            | Cross sectional questionnaire                                                  | Investigating the knowledge, attitude and practice of healthcare providers in relation to OD management.                         | 40% did not know the definition of OD and were unsure. Whilst most believed their role included identifying and caring for patients with OD, only 10% knew how to identify.                     | High relevance<br>Moderate richness<br>Rigour: 5/7 |
| <b>Guo et al. (2023)</b><br>(4)      | Nursing adherence, barriers and facilitators to conduct post-stroke dysphagia screening and assessment: A study based on theoretical domain framework | China     | Secondary & tertiary hospitals | Nurses (N=956)                                 | Mixed methods-<br>Cross sectional online survey and semi-structured interviews | Exploration of nurses' adherence, barriers, facilitators and views on OD identification and assessment of post-stroke dysphagia. | Nurses with the required knowledge and skills felt more confident to identify OD. Integration of OD identification into electronic systems would prompt nurses to carry this out.               | High relevance<br>High richness<br>Rigour: 4/7     |
| <b>Haggerty et al. (2005)</b><br>(5) | Patients' anxiety and expectations; How they influence family physicians' decisions to order cancer screening tests                                   | Canada    | General practice               | Physicians (N=351)                             | Cross sectional questionnaire                                                  | Investigation of the influence of patients' anxiety or expectations on physicians' decision to order cancer screening tests.     | 88% of physicians would be influenced to order a screening if they knew patients' expectations.                                                                                                 | High relevance<br>Moderate richness<br>Rigour: 6/7 |
| <b>Ireland et al. (2018)</b><br>(6)  | General Practitioners' Use of Risk Prediction Tools and their Application to Barrett's Oesophagus: A Qualitative Study                                | Australia | General practice               | GPs (N=5)<br>Gastroenterologist (N=1)          | Qualitative-<br>Semi-structured interviews                                     | Exploration of GPs' perspectives of the barriers and enablers to cancer risk prediction models and identification tools.         | Due to workload, doctors prefer identification tools/protocols which are simple to use and easy to access. These prompt doctors to ask questions, provide clear guidance, aid in keeping focus. | High relevance<br>High richness<br>Rigour: 6/7     |
| <b>Murray et al. (2021)</b><br>(7)   | Four-hour swallow screening target for stroke – from                                                                                                  | Australia | Hospital                       | Patients (N=365)<br>Nurses (N=7)<br>Nurse unit | Mixed methods-<br>Cross-sectional                                              | Investigation of nurses' compliance with identifying swallow                                                                     | Checklists which are simple to use, have clear guidelines and                                                                                                                                   | High relevance                                     |

|                                              |                                                                                                                |              |                          |                                                                                                |                                                    |                                                                                                                                                       |                                                                                                                                                              |                                                    |
|----------------------------------------------|----------------------------------------------------------------------------------------------------------------|--------------|--------------------------|------------------------------------------------------------------------------------------------|----------------------------------------------------|-------------------------------------------------------------------------------------------------------------------------------------------------------|--------------------------------------------------------------------------------------------------------------------------------------------------------------|----------------------------------------------------|
|                                              | guidelines to practice: A mixed methods knowledge translation study                                            |              |                          | manager (N=2)<br>Specialist stroke nurse consultant (n=1)<br>Medical staff (N=2)<br>SLT (N= 2) | observational and semi-structured interviews study | difficulties within the 4-hour target for stroke patients and exploration of clinicians' perceptions of enablers and barriers to meeting this target. | indicators, can be completed in a timely manner, and facilitate HCPs to identify at-risk patients.                                                           | Moderate richness<br>Rigour: 5/7                   |
| <b>Oliveira et al. (2020)</b><br>(8)         | Nurses' preferred items for dysphagia screening in acute stroke patients: A qualitative study                  | Portugal     | Hospital                 | Nurses (N=20)                                                                                  | Qualitative-Focus groups                           | Exploration of signs and symptoms stroke nurses prioritize to identify OD in acute stroke patients.                                                   | Nurses investigate different signs of OD during informal identification. Informal processes lead to inconsistencies in identifying OD.                       | High relevance<br>High richness<br>Rigour: 3/7     |
| <b>Pierpoint et al. (2020)</b><br>(9)        | Post-stroke dysphagia: An exploration of initial identification and management performed by nurses and doctors | South Africa | Hospital                 | Nurses (N=21)<br>Doctors (N=4)                                                                 | Cross sectional questionnaire study                | Investigation of how doctors and registered nurses identify and manage patients with post-stroke OD.                                                  | Without the required knowledge on OD or formal checklist, nurses and doctors have no standardised approach to OD identification and miss key symptoms of OD. | High relevance<br>High richness<br>Rigour: 5/7     |
| <b>Sánchez-Sánchez et al. (2021)</b><br>(10) | Knowledge and Practice of Health Professionals in the Management of Dysphagia                                  | Spain        | Hospital<br>Primary care | Nurses (N=400)                                                                                 | Descriptive cross sectional questionnaire study    | Investigating the knowledge, attitude and practice of healthcare providers in relation to OD management.                                              | Nurses and physicians were unsure of how to identify OD or the processes/tools used in their settings for OD identification.                                 | High relevance<br>Moderate richness<br>Rigour: 5/7 |
| <b>Tudiver et al. (2001)</b><br>(11)         | Making Decisions About Cancer Screening When the Guidelines Are Unclear or Conflicting                         | Canada       | Community                | Family physicians (N= 73)                                                                      | Qualitative-Focus groups                           | Exploration of factors involved in cancer screening decisions when clinical practice guidelines are unclear/conflicting.                              | Patient expectations and demands for screening were major determinants of physicians' decision to screen when guidelines were unclear.                       | High relevance<br>Moderate richness<br>Rigour: 5/7 |

## References

1. Barker J, Davidson M, Fan E, Hellen S, Williams T. The development and implementation of an evidence-based risk reduction algorithm for post extubation dysphagia in intensive care. *Canadian Journal of Critical Care Nursing*. 2022;33(1):22–30.
2. Bowen A, Gómez-Trillos S, Curran G, Graves KD, Sheppard VB, Schwartz MD, et al. Advancing health equity: A qualitative study assessing barriers and facilitators of implementing hereditary breast and ovarian cancer risk screening tools in community-based organizations. *Journal of Genetic Counseling*. 2023 Apr 16;jgc4.1705.
3. Farpour S, Farpour HR, Smithard D, Kardeh B, Ghazaei F, Zafarghasempour M. Dysphagia Management in Iran: Knowledge, Attitude and Practice of Healthcare Providers. *Dysphagia*. 2019;34(1):105–11.
4. Guo Y, Guo L, Dong X, Yang C, Wang M, Gao H, et al. Nursing adherence, barriers and facilitators to conduct post-stroke dysphagia screening and assessment: A study based on theoretical domain framework. *Journal of Clinical Nursing*. 2023 Jan 30;jocn.16623.
5. Haggerty J, Tudiver F, Brown JB, Herbert C, Ciampi A, Guibert R. Patients' anxiety and expectations; How they influence family physicians' decisions to order cancer screening tests. *Canadian Family Physician*. 2005;51:1659–67.
6. Ireland CJ, Laws TA, Thompson SK. General Practitioners' Use of Risk Prediction Tools and their Application to Barrett's Oesophagus: A Qualitative Study. 2018;2(1).
7. Murray J, Havlis J, Varvounis N. Four-hour swallow screening target for stroke – from guidelines to practice: A mixed methods knowledge translation study. *International Journal of Speech-Language Pathology*. 2021 Sep 3;23(5):519–28.
8. Oliveira IDJ, Couto GR, Neves Da Mota LA. Nurses' preferred items for dysphagia screening in acute stroke patients: A qualitative study. *NPT [Internet]*. 2020 Jun 21 [cited 2023 May 4]; Available from: <https://publish.kne-publishing.com/index.php/NPT/article/view/3351>
9. Pierpoint M, Pillay M. Post-stroke dysphagia: An exploration of initial identification and management performed by nurses and doctors. *South African Journal of Communication Disorders [Internet]*. 2020 May 28 [cited 2023 May 9];67(1). Available from: <http://www.sajcd.org.za/index.php/SAJCD/article/view/625>
10. Sánchez-Sánchez E, Avellaneda-López Y, García-Marín E, Ramírez-Vargas G, Díaz-Jimenez J, Ordonez FJ. Knowledge and Practice of Health Professionals in the Management of Dysphagia. *IJERPH*. 2021 Feb 22;18(4):2139.

11. Tudiver F, Brown JB, Medved W, Herbert C, Ritvo P, Guibert R. Making Decisions About Cancer Screening When the Guidelines Are Unclear or Conflicting. *J Fam Pract*. 2001 Aug;50(8):682–7.
